# Supplementary material for: Mutations inVANGL1Associated with Neural-Tube Defects
Source: Atypon-hosted journal article supplement (doi:10.1056/nejmoa060651), 2007-04-04
Supplement: nejm_kibar_1432sa1.pdf [file nejm_kibar_1432sa1.pdf]

## Supplementary Appendix

This appendix has been provided by the authors to give readers additional information about their work.

Supplement to: Kibar Z, Torban E, McDearmid JR, et al. Mutations in *VANGL1* associated with neural-tube defects. *N Engl J Med* 2007;356:1432-7.

## Supplementary Methods

### *Interaction between Vangl and Dishevelled proteins*

A cDNA segment corresponding to the cytoplasmic domain of the wild type (Accession # BC065272; 975-1829nt) as well as V239I, D259E, R274Q, M328T, and S467N

hVANGL1 protein variants were cloned into the yeast plasmid pBDT7 (pBD-hVANGL1). Individual cDNA fragments overlapping either the amino half of

Dishevelled proteins 1, 2 and 3 [Dvl1(1-404aa), Dvl12(1-418), Dvl3(1-395aa)], or the carboxyl portion of Dvl3 (389-717aa) were inserted in the pGADT7 plasmid.<sup>10</sup>

*hVANGL1* constructs were introduced into *Saccharomyces cerevisiae* (strain AH109, MAT $\alpha$ ), and independent AH109 clones were mated to *S. cerevisiae* clones (strain Y187, MAT $\alpha$ ) expressing individual Dvl proteins. GAL4 activity was tested as previously described.<sup>10</sup> In the matchmaker system 3, reconstituted GAL4 activity (interaction between fusions to the GAL4 DNA binding and activation domains) is tested by plating diploid cells on selection media of various stringency: low stringency lacking leucine and tryptophan (-Leu/-Trp), intermediate stringency lacking histidine, leucine and tryptophan (-His/-Leu/-Trp) and high stringency lacking adenine, histidine, leucine, and tryptophan (-Ade/-His/-leu/-Trp).

| <i>Supplementary Table 1. Clinical features of familial NTD cases and their affected relatives*</i> |                                                                                                 |                                                              |
|-----------------------------------------------------------------------------------------------------|-------------------------------------------------------------------------------------------------|--------------------------------------------------------------|
| <b>Patient</b>                                                                                      | <b>Clinical features of patient</b>                                                             | <b>Affected relatives and their clinical signs</b>           |
| <b>Patient 19</b><br>M, 17 years old                                                                | MMC, Chiari II                                                                                  | Brother (dermal sinus)                                       |
| <b>Patient 32</b><br>M, 18 years old                                                                | MMC, Chiari II, Hydrocephalus, tethered cord                                                    | Maternal grandmother (dermal sinus)                          |
| <b>Patient 48</b><br>F, 19 years old                                                                | MMC (level L5-S1), Hydrocephalus, congenital club feet                                          | Mother and maternal aunt (vertebral schisis)                 |
| <b>Patient 49</b><br>F, 13 years old                                                                | MMC, Chiari II                                                                                  | Sister (MMC, Chiari II)                                      |
| <b>Patient 55</b><br>F, 35 years old                                                                | Lipomys, tethered cord                                                                          | Sister, mother, two nephews (vertebral schisis)              |
| <b>Patient 56</b><br>M, 21 years old                                                                | MMC, Hydrocephalus, Hydrosyringomyelia, tethered cord                                           | Brother (MMC)                                                |
| <b>Patient 89</b><br>M, 16 years old                                                                | CR (type IV <sup>†</sup> ), costo- vertebral malformations, kyphosis, ectopic kidney            | Paternal aunt, second-degree cousin (closed NTD)             |
| <b>Patient 96</b><br>M, 18 years old                                                                | CR (type V <sup>†</sup> ), ano-rectal malformations                                             | Mother (absence of coccygeal segments)                       |
| <b>Patient 103</b><br>F, 10 years old                                                               | CR (Type IV <sup>†</sup> ), lipomys, Ano-rectal malformation, hydromyelia, tethered spinal cord | Brother (dermal sinus)                                       |
| <b>Patient 140</b><br>F, 8 years old                                                                | MMC (L5-S1), Chiari II, hydrocephalus, absence of sacrum, single kidney                         | Grandgrandfather (closed NTD)                                |
| <b>Patient 146</b><br>F, 14 years old                                                               | MMC, Chiari II, hydrocephalus                                                                   | Maternal first-degree cousin (MMC, Chiari II, hydrocephalus) |
| <b>Patient 147</b><br>F, 11 years old                                                               | LipoMMC                                                                                         | Paternal uncle (spinal lipoma)                               |
| <b>Patient 155</b><br>M, 3 years old                                                                | MMC, hydrocephalus                                                                              | Maternal second-degree cousin (MMC)                          |

\*M denotes male, F female, MMC Myelomeningocele, lipoMMC lipomyelomeningocele, lipomys lipomyeloschisis, CR caudal regression

<sup>†</sup>According to Pang's classification.<sup>12</sup>

**Supplementary Table 2. Sequence variants detected in the ORF of VANGL1 and their frequency in NTD patients and controls**

| nt<br>(aa)                               | Sequence variants in patients and controls |                  |                  |                  | Sequence variants specific to patients |                  |                  |                  |                  |                  |                   |
|------------------------------------------|--------------------------------------------|------------------|------------------|------------------|----------------------------------------|------------------|------------------|------------------|------------------|------------------|-------------------|
|                                          | A274G<br>(I92V)                            | C330T<br>(Y110Y) | G346A<br>(A116T) | C780T<br>(G260G) | A323G<br>(K108R)                       | T435C<br>(C145C) | C523T<br>(R175W) | G715A<br>(V239I) | G821A<br>(R274Q) | T983C<br>(M328T) | G1341A<br>(A447A) |
| <b>Spina bifida</b><br>(N=137)           | 1                                          | 1                | 23               | 1                | 1                                      | 1                | 1                | 1                | 1                | 1                | 1                 |
| <b>Cranio-<br/>rachischisis</b><br>(N=7) | 0                                          | 1                | 1                | 0                | 0                                      | 0                | 0                | 0                | 0                | 0                | 0                 |
| <b>Controls<sup>a</sup></b>              | 1 (146)                                    | 3 (150)          | 24 (150)         | 1 (116)          | 0 (150)                                | 0 (150)          | 0 (150)          | 0 (166)          | 0 (168)          | 0 (165)          | 0 (156)           |

<sup>a</sup> The numbers shown in parentheses indicate the number of controls analyzed for each sequence variant (including 85-106 Italians ethnically-matched for the spina bifida cases and 65 CEPH individuals)
